# Supplementary material for: Designed synthesis of SnO2@C yolk–shell spheres for high-performance lithium storage
Source: Royal Society of Chemistry journal article supplement (doi:10.1039/c3ce41571f), 2013-10-24
Supplement: c3ce41571f.pdf [file c3ce41571f.pdf]

# Designed Synthesis of SnO<sub>2</sub>@C Yolk–Shell Spheres for High-Performance Lithium Storage

Jianping Li, Ping Wu,\* Ya Ye, Hui Wang, Yiming Zhou, Yawen Tang and Tianhong

Lu

Jiangsu Key Laboratory of New Power Batteries, Jiangsu Collaborative Innovation

Center of Biomedical Functional Materials, School of Chemistry and Materials

Science, Nanjing Normal University, Nanjing 210023, PR China.

E-mail: [zjuwuping@njnu.edu.cn](mailto:zjuwuping@njnu.edu.cn)

## Experimental Section

**Synthesis of SnO<sub>2</sub>@C Yolk–Shell Spheres.** All the chemicals were analytical grade without further purification. First, Sn spheres were prepared by a simple polyol method according to the previous report.<sup>26</sup> Second, SiO<sub>2</sub> layer was coated on Sn sphere templates through a modified Stöber method.<sup>33</sup> Third, the Sn@SiO<sub>2</sub> spheres were oxidized in a tubular furnace at 600 °C for 12 h under flowing oxygen. Fourth, the SnO<sub>2</sub>@SiO<sub>2</sub> spheres were coated with carbon layers through the pyrolysis of PVDF. Briefly, 0.1 g SnO<sub>2</sub>@SiO<sub>2</sub> spheres and 0.1 g polyvinylidene fluoride (PVDF) were mixed and added into 2 mL N-methyl-2-pyrrolidone (NMP), and the mixture was stirred for 24 h and then dried at 120 °C under vacuum. Subsequently, the dried sample was pyrolyzed at 500 °C for 3 h under N<sub>2</sub>. Finally, the obtained SnO<sub>2</sub>@SiO<sub>2</sub>@C spheres were treated with 10 % HF aqueous solution for 12 h to

remove SiO<sub>2</sub> layer, resulting in SnO<sub>2</sub>@C yolk–shell spheres. For comparison, bare SnO<sub>2</sub> spheres was prepared by thermal oxidation of Sn spheres at 600 °C for 12 h under flowing oxygen, whereas pure PVDF-derived carbon was obtained through pyrolysis of PVDF at 500 °C for 3 h under N<sub>2</sub>.

**Characterization.** The morphology, structure, and composition of the samples were characterized by transmission electron microscopy (TEM, JEOL H-7650, 120 kV), scanning electron microscopy (SEM, JEOL JSM-7600F), and high-resolution transmission electron microscopy (HRTEM, JEOL JEM-2010F, 200 kV) equipped with energy-dispersive X-ray spectrometer (EDX, Thermo Fisher Scientific, NORAN System 7). X-ray powder diffraction (XRD) measurements were performed with Model D/max-rC diffractometer using Cu-K $\alpha$  radiation ( $\lambda=0.15406$  nm) and operating at 45 kV and 100 mA. The Brunauer-Emmett-Teller (BET) specific surface area and pore size distribution were measured at 77 K using a Micromeritics ASAP 2050 system. The differential scanning calorimetry and thermogravimetric analysis (DSC-TGA) was performed on a Petkin Elmer Diamond instrument in air at a ramping rate of 5 °C min<sup>-1</sup>.

#### **Electrochemical Measurements of SnO<sub>2</sub>@C Yolk–Shell Spheres.**

Electrochemical measurements were performed by coin-type half cells which were assembled in an IL-2GB glove box (Innovative Technology) filled with ultra-pure argon. For the preparation of working electrodes, a mixture of SnO<sub>2</sub>@C yolk–shell spheres, Super P, and PVDF in NMP at a weight ratio of 80 : 10 : 10 were mixed, then the slurry was coated on the surface of Cu foam substrates at room temperature and

dried at 120 °C under vacuum overnight. The counter electrode was lithium metal foil, and the electrolyte solution was 1 M solution of LiPF<sub>6</sub> in ethylene carbonate (EC) and dimethyl carbonate (DMC) (1:1 by volume). Finally, the cells were aged for 12 h before measurements. A galvanostatic cycling test of the assembled cells was carried out on a Land CT2001A system in the potential range of 0.01-2 V. Cyclic voltammetry (CV) measurements were recorded on a CHI 660C electrochemical workstation in the potential range of 0.0-2.0 V at a scan rate of 0.1 mV s<sup>-1</sup>. Electrochemical impedance spectroscopy (EIS) tests were performed on a CHI 760D electrochemical workstation with the frequency ranging from 100 kHz to 0.01 Hz and an ac signal of 5 mV in amplitude. The voltages mentioned herein were referred to Li<sup>+</sup>/Li redox couple.
